# Supplementary material for: Plasma phosphorylated tau 217 in preclinical Alzheimer’s disease
Source: PubMed Central journal article supplement (PMC10066514; doi:10.1093/braincomms/fcad057), 2023-03-06
Supplement: fcad057_supplementary_data.pdf [file fcad057_supplementary_data.pdf]

### **Supplementary material**

**Sensitivity set 1:** Starting from primary analysis set, includes 8 additional participants excluded from primary analysis: 6 due to cognitive impairment at first plasma, 1 due to missing diagnosis at first plasma, and 1 due to phosphorylated tau-217 (pTau\_217) values found to be highly influential using Cook's *d*.

**Sensitivity set 2:** Starting from primary analysis set, excludes 6 additional observations with measured pTau\_217 values below the lower limit of detection.

**Supplementary Table 1**

Results of an exploratory linear mixed effect model of pTau<sub>217</sub> as a function of the interaction between PiB positivity, years of education, and age. Model included a per-participant random intercept. pTau<sub>217</sub> = phosphorylated tau 217.

| <i>Predictors</i>                                                  | <b>Exploratory model</b> |              |                  |
|--------------------------------------------------------------------|--------------------------|--------------|------------------|
|                                                                    | <i>Estimates</i>         | <i>CI</i>    | <i>p</i>         |
| Intercept                                                          | 0.23                     | 0.20 – 0.27  | <b>&lt;0.001</b> |
| Education [Years, centered]                                        | -0.00                    | -0.02 – 0.02 | 0.928            |
| Amyloid positivity                                                 | 0.19                     | 0.14 – 0.25  | <b>&lt;0.001</b> |
| Age [centered], linear                                             | 0.00                     | -0.00 – 0.00 | 0.350            |
| Education [centered] x Amyloid positivity                          | -0.02                    | -0.04 – 0.01 | 0.183            |
| Education [centered] x Age [centered], linear                      | 0.00                     | -0.00 – 0.00 | 0.818            |
| Amyloid positivity x Age [centered], linear                        | 0.02                     | 0.02 – 0.03  | <b>&lt;0.001</b> |
| Education [centered] x Amyloid positivity x Age [centered], linear | -0.00                    | -0.00 – 0.00 | 0.504            |
| <b>Random Effects</b>                                              |                          |              |                  |
| $\sigma^2$                                                         | 0.01                     |              |                  |
| $\tau_{00}$ Reggieid                                               | 0.03                     |              |                  |
| ICC                                                                | 0.81                     |              |                  |
| N Reggieid                                                         | 165                      |              |                  |
| Observations                                                       | 515                      |              |                  |
| Marginal R <sup>2</sup> / Conditional R <sup>2</sup>               | 0.357 / 0.879            |              |                  |

**Supplementary Table 2**

Results of linear mixed effect models of PACC-3 as a function of covariates plus baseline plasma pTau<sub>217</sub> and its interaction with age, in two sensitivity sets. The first sensitivity set includes the primary analysis set plus eight additional participants who were cognitively impaired at first plasma draw (N=6), who did not have a consensus diagnosis at this visit (N=1) or who had extreme values of pTau<sub>217</sub> (N=1). The second sensitivity set includes the primary analysis set, minus 6 observations on 5 participants for which the observed pTau<sub>217</sub> values were below the lower limit of detection. In both models, age was modeled as a second-degree polynomial. Models included a per-participant random intercept. PACC-3 = three-test preclinical Alzheimer's cognitive composite; pTau<sub>217</sub> = phosphorylated tau 217.

| <i>Predictors</i>                            | <b>Sensitivity set 1</b>     |               |                  | <b>Sensitivity set 2</b>     |               |                  |
|----------------------------------------------|------------------------------|---------------|------------------|------------------------------|---------------|------------------|
|                                              | <i>Estimates</i>             | <i>CI</i>     | <i>p</i>         | <i>Estimates</i>             | <i>CI</i>     | <i>p</i>         |
| Intercept                                    | -4.24                        | -5.89 – -2.60 | <b>&lt;0.001</b> | -4.14                        | -5.84 – -2.45 | <b>&lt;0.001</b> |
| Sex [Male]                                   | -0.55                        | -0.83 – -0.26 | <b>&lt;0.001</b> | -0.49                        | -0.76 – -0.21 | <b>0.001</b>     |
| Education [Years]                            | 0.08                         | 0.00 – 0.15   | <b>0.041</b>     | 0.10                         | 0.03 – 0.18   | <b>0.006</b>     |
| Baseline literacy                            | 0.03                         | 0.01 – 0.04   | <b>0.003</b>     | 0.02                         | 0.00 – 0.04   | <b>0.017</b>     |
| Practice                                     | 0.15                         | 0.08 – 0.21   | <b>&lt;0.001</b> | 0.14                         | 0.08 – 0.21   | <b>&lt;0.001</b> |
| Age [centered], linear                       | -0.17                        | -0.31 – -0.03 | <b>0.020</b>     | -0.05                        | -0.23 – 0.14  | 0.623            |
| Age [centered], quadratic                    | -0.08                        | -0.11 – -0.06 | <b>&lt;0.001</b> | -0.09                        | -0.11 – -0.06 | <b>&lt;0.001</b> |
| Baseline pTau217                             | -0.00                        | -0.00 – -0.00 | <b>0.001</b>     | -0.00                        | -0.00 – -0.00 | <b>0.027</b>     |
| Baseline pTau217 x Age [centered], linear    | -0.06                        | -0.07 – -0.04 | <b>&lt;0.001</b> | -0.08                        | -0.09 – -0.06 | <b>&lt;0.001</b> |
| Baseline pTau217 x Age [centered], quadratic | -0.00                        | -0.00 – -0.00 | <b>0.049</b>     | -0.00                        | -0.00 – 0.00  | 0.524            |
| <b>Random Effects</b>                        |                              |               |                  |                              |               |                  |
| $\sigma^2$                                   | 0.20                         |               |                  | 0.20                         |               |                  |
| $\tau_{00}$                                  | 0.69 <small>Reggieid</small> |               |                  | 0.63 <small>Reggieid</small> |               |                  |
| ICC                                          | 0.77                         |               |                  | 0.76                         |               |                  |

## Jonaitis: Plasma p-tau217 in preclinical Alzheimer's disease

| N                                                    | 172 <small>Reggieid</small> | 165 <small>Reggieid</small> |
|------------------------------------------------------|-----------------------------|-----------------------------|
| Observations                                         | 523                         | 503                         |
| Marginal R <sup>2</sup> / Conditional R <sup>2</sup> | 0.345 / 0.851               | 0.332 / 0.842               |

**Supplementary Table 3**

Results of an exploratory linear mixed effect model of PACC-3 as a function of covariates plus baseline plasma pTau<sub>217</sub> and its interaction with age and education. Age was modeled as a second-degree polynomial. Model included a per-participant random intercept. PACC-3 = three-test preclinical Alzheimer's cognitive composite; pTau<sub>217</sub> = phosphorylated tau 217.

| <i>Predictors</i>                                                   | <b>Exploratory model</b> |               |                  |
|---------------------------------------------------------------------|--------------------------|---------------|------------------|
|                                                                     | <i>Estimates</i>         | <i>CI</i>     | <i>p</i>         |
| Intercept                                                           | -2.74                    | -4.69 – -0.79 | <b>0.006</b>     |
| Sex [Male]                                                          | -0.51                    | -0.79 – -0.23 | <b>&lt;0.001</b> |
| Baseline literacy                                                   | 0.02                     | 0.01 – 0.04   | <b>0.010</b>     |
| Practice                                                            | 0.15                     | 0.08 – 0.22   | <b>&lt;0.001</b> |
| Education [Years, centered]                                         | 0.10                     | 0.02 – 0.17   | <b>0.018</b>     |
| Baseline pTau217                                                    | -0.05                    | -0.24 – 0.14  | 0.589            |
| Age [centered], linear                                              | -0.09                    | -0.11 – -0.06 | <b>&lt;0.001</b> |
| Age [centered], quadratic                                           | -0.00                    | -0.00 – -0.00 | <b>0.023</b>     |
| Education [centered] x Baseline pTau217                             | 0.03                     | -0.05 – 0.11  | 0.413            |
| Education [centered] x Age [centered], linear                       | -0.01                    | -0.01 – 0.00  | 0.070            |
| Baseline pTau217 x Age [centered], linear                           | -0.08                    | -0.10 – -0.05 | <b>&lt;0.001</b> |
| Education [centered] x Age [centered], quadratic                    | 0.00                     | -0.00 – 0.00  | 0.774            |
| Baseline pTau217 x Age [centered], quadratic                        | -0.00                    | -0.00 – 0.00  | 0.724            |
| Education [centered] x Baseline pTau217 x Age [centered], linear    | 0.00                     | -0.01 – 0.01  | 0.507            |
| Education [centered] x Baseline pTau217 x Age [centered], quadratic | -0.00                    | -0.00 – 0.00  | 0.433            |
| <b>Random Effects</b>                                               |                          |               |                  |
| $\sigma^2$                                                          | 0.20                     |               |                  |
| $\tau_{00}$ Reggield                                                | 0.64                     |               |                  |
| ICC                                                                 | 0.77                     |               |                  |
| N Reggield                                                          | 165                      |               |                  |
| Observations                                                        | 509                      |               |                  |

## Jonaitis: Plasma p-tau217 in preclinical Alzheimer's disease

Marginal  $R^2$  / Conditional  $R^2$

0.334 / 0.844

### Supplementary Figure Captions

#### Supplementary Figure 1. Longitudinal plasma pTau<sub>217</sub>, sensitivity set 1

(including 6 participants who were cognitively impaired at baseline; one with no baseline diagnosis; and one influential pTau<sub>217</sub> observation). Observations from a single participant are shown with connected edges. (A) Plasma pTau<sub>217</sub> as a function of age at blood draw. Color indicates the extent of tau burden as indicated on tau PET. (B) Plasma pTau<sub>217</sub> as a function of estimated PiB DVR at the time of plasma acquisition. Color indicates the extent of tau burden as indicated on tau PET. (C) Plasma pTau<sub>217</sub> as a function of age at blood draw. Color indicates amyloid PET positivity. Lines with shaded confidence bands represent slope estimates from a linear mixed effects model of pTau<sub>217</sub> as a function of the interaction of age and amyloid positivity. (D) Distribution of pTau<sub>217</sub> among PiB- and PiB+ participants. (E) Distribution of pTau<sub>217</sub> among MK- and MK+ participants. (F) Receiver-operator characteristic (ROC) curve relating pTau<sub>217</sub> to binary PiB status. Two positivity thresholds were considered for PiB: global DVR > 1.19 (red) and global DVR > 1.16 (blue). (G) ROC curve relating pTau<sub>217</sub> to binary MK status. Scans were marked as MK+ if tracer binding was evident in both medial temporal lobe and neocortex, and MK- otherwise. DVR = distribution volume ratio; GBTM-DVR = group-based trajectory modeled DVR from amyloid PET; MK = [<sup>18</sup>F]-MK-6240 tau tracer; PiB = Pittsburgh compound B; pTau<sub>217</sub> = phosphorylated tau 217; ROC = receiver-operator characteristic.

#### Supplementary Figure 2. Longitudinal plasma pTau<sub>217</sub>, sensitivity set 2

(excluding 6 observations from 5 participants in which the pTau<sub>217</sub> value fell below the lower limit of detection). Observations from a single participant are shown with connected

Jonaitis: Plasma p-tau<sub>217</sub> in preclinical Alzheimer's disease

edges. (A) Plasma pTau<sub>217</sub> as a function of age at blood draw. Color indicates the extent of tau burden as indicated on tau PET. (B) Plasma pTau<sub>217</sub> as a function of estimated PiB DVR at the time of plasma acquisition. Color indicates the extent of tau burden as indicated on tau PET. (C) Plasma pTau<sub>217</sub> as a function of age at blood draw. Color indicates amyloid PET positivity. Lines with shaded confidence bands represent slope estimates from a linear mixed effects model of pTau<sub>217</sub> as a function of the interaction of age and amyloid positivity. (D) Distribution of pTau<sub>217</sub> among PiB- and PiB+ participants. (E) Distribution of pTau<sub>217</sub> among MK- and MK+ participants. (F) Receiver-operator characteristic (ROC) curve relating pTau<sub>217</sub> to binary PiB status. Two positivity thresholds were considered for PiB: global DVR > 1.19 (red) and global DVR > 1.16 (blue). (G) ROC curve relating pTau<sub>217</sub> to binary MK status. Scans were marked as MK+ if tracer binding was evident in both medial temporal lobe and neocortex, and MK- otherwise. DVR = distribution volume ratio; GBTM-DVR = group-based trajectory modeled DVR from amyloid PET; MK = [<sup>18</sup>F]-MK-6240 tau tracer; PiB = Pittsburgh compound B; pTau<sub>217</sub> = phosphorylated tau 217; ROC = receiver-operator characteristic.

**Supplementary Figure 3. Relationship between pTau<sub>217</sub> and longitudinal cognition, sensitivity set 1** (including 6 participants who were cognitively impaired at baseline; one with no baseline diagnosis; and one influential pTau<sub>217</sub> observation). Global cognition (PACC-3) as a function of age and baseline pTau<sub>217</sub> level. Low, medium, and high pTau<sub>217</sub> values reflect the 10th, 50th, and 90th sample percentiles.

**Supplementary Figure 4. Relationship between pTau<sub>217</sub> and longitudinal cognition, sensitivity set 2** (excluding 6 observations from 5 participants in which the



Jonaitis: Plasma p-tau217 in preclinical Alzheimer's disease

pTau<sub>217</sub> value fell below the lower limit of detection). Global cognition (PACC-3) as a function of age and baseline pTau<sub>217</sub> level. Low, medium, and high pTau<sub>217</sub> values reflect the 10th, 50th, and 90th sample percentiles.

### Supplementary Figure 1

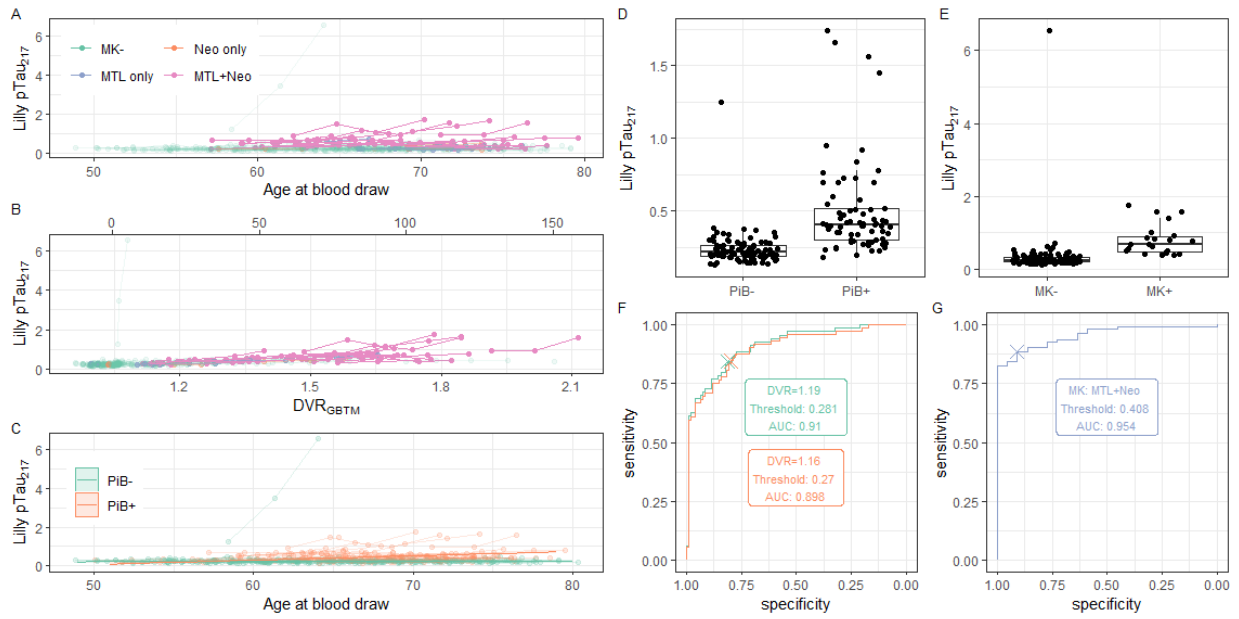

### Supplementary Figure 2

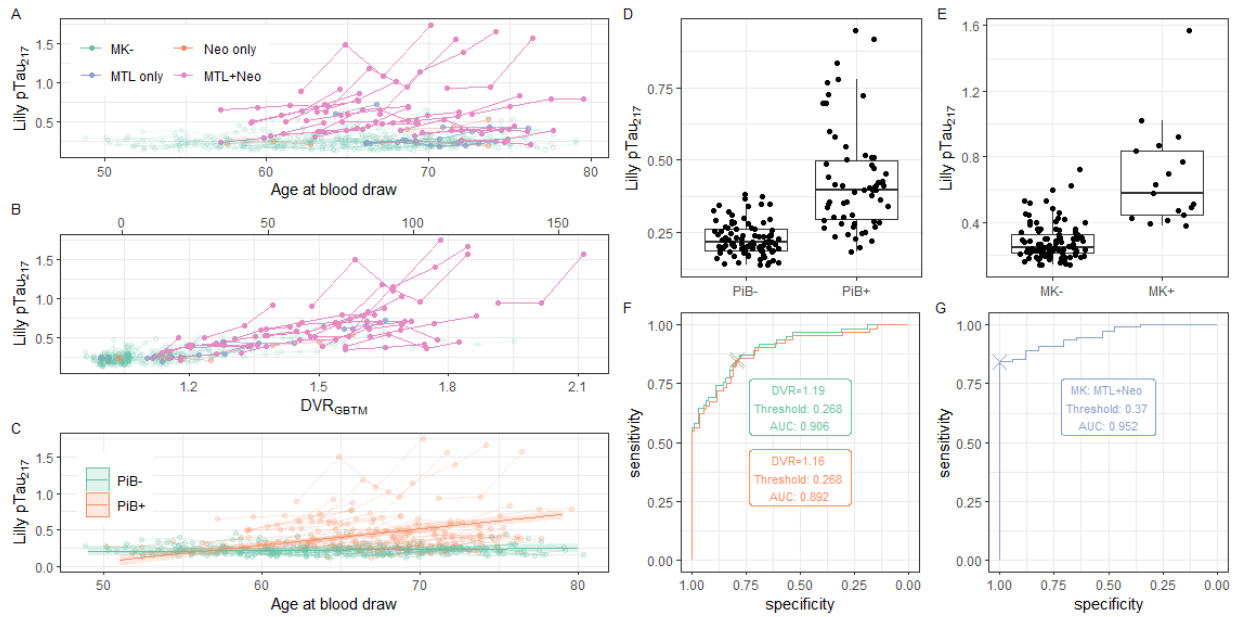

**Supplementary Figure 3**

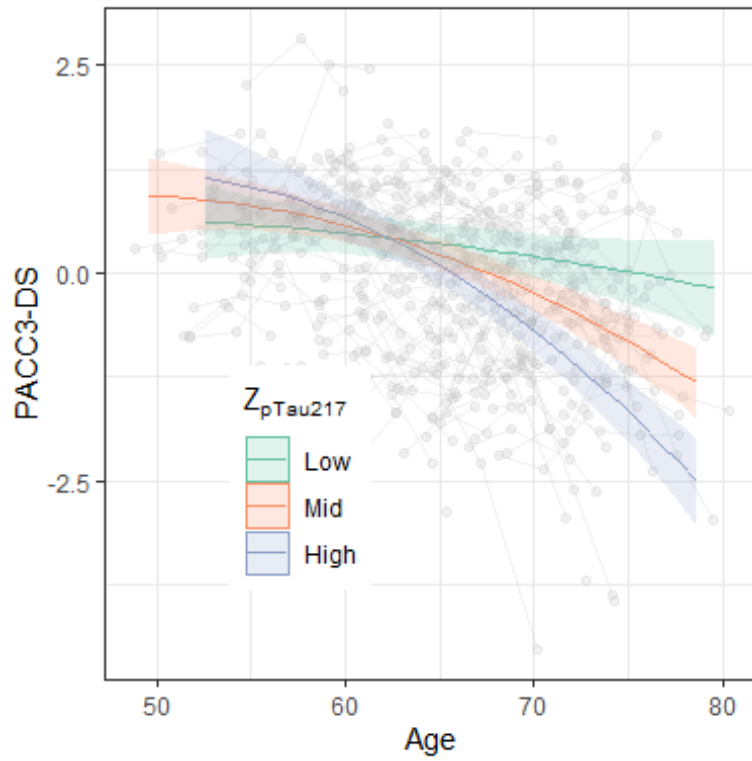

Supplementary Figure 4

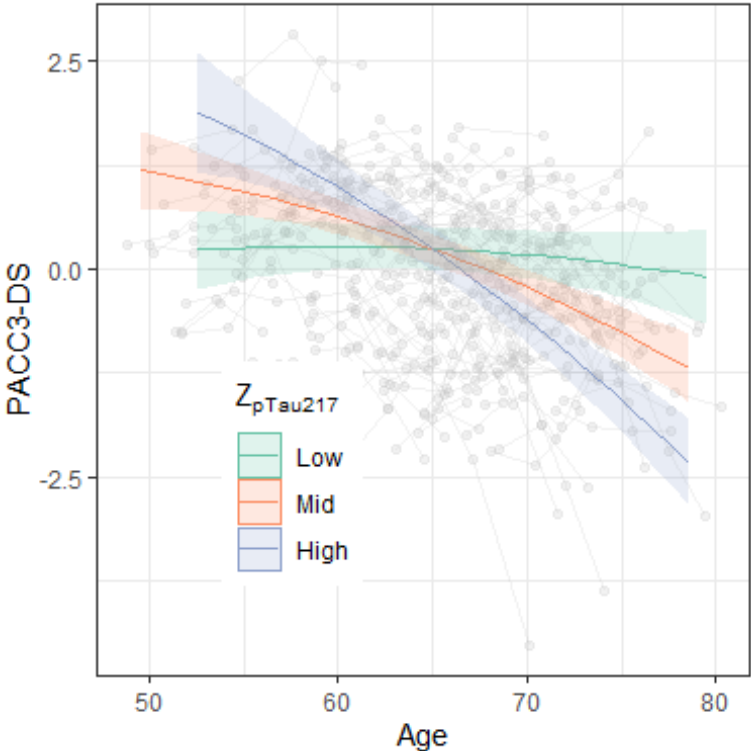

## Jonaitis: Plasma p-tau217 in preclinical Alzheimer's disease

```
# Assemble analysis dataset for for Oskar Hansson's ptau217 data

# Datafile should contain
# - Blood biomarkers at WRAP visits
# - Cognition at the same WRAP visits
# - Last PiB and MK
# - Nearest PiB and MK
# - Estimated PiB at WRAP visits (GBTM and ILLA)

library(dplyr)
library(tidyr)
library(odbc)
library(readxl)
library(lubridate)
library(emj)

# Constants for Sweden/Roche CSF data
LLMR <- c(0,200,8,80,0,0,0,0,1.5)
names(LLMR) <-
c("ABeta_1_40","ABeta_1_42","pTau","tTau","Inv_ABeta_1_42_derived","ABeta_1_42_40_derived","pTau_ABeta_1_42_derived","tTau_ABeta_1_42_derived","IL6")
ULMR <- c(Inf,1700,120,1300,Inf,Inf,Inf,Inf,Inf)
names(ULMR) <-
c("ABeta_1_40","ABeta_1_42","pTau","tTau","Inv_ABeta_1_42_derived","ABeta_1_42_40_derived","pTau_ABeta_1_42_derived","tTau_ABeta_1_42_derived","IL6")

cutoff <- c(0.046, 0.038, 513.9, 24.8, 293, 266, 1296, 209)
names(cutoff) <- c("ABeta_1_42_40_derived","pTau_ABeta_1_42_derived", "ABeta_1_42", "pTau", "tTau", "a_Synuclein", "Neurogranin", "NFL")

picklist <- read.csv("../data/hansson_picklist_20201201.csv")

# Merging back with WRAP data
# Updated March 2022 to use most recent freezez
livedb <- odbc::dbConnect(odbc::odbc(), dsn="WRAP2007_Prod_DOM_64")
freeze <- odbc::dbConnect(odbc::odbc(), dsn="Freeze 2021_May")

cc <- odbc::dbGetQuery(freeze, "SELECT WRAPNo, VisNo, consensus_dx FROM ConsensusConferenceDiagnosis")

dm <- odbc::dbGetQuery(freeze, "SELECT Demographics.WRAPNo, gender, EdYears_Coded_Max20, WRAPRaceAssignment, all1, all2
FROM (Demographics LEFT JOIN MiscVars ON Demographics.WRAPNo = MiscVars.WRAPNo)
LEFT JOIN APG ON Demographics.WRAPNo = APG.WRAPNo") %>%
mutate(apoe4_bin = ifelse(is.na(all2), NA,
ifelse(all2==4, 1, 0)),
apoe4_ct = ifelse(is.na(all1), NA,
ifelse(all1==4, 2,
ifelse(all2==4, 1, 0))))

vv <- odbc::dbGetQuery(livedb, "SELECT WRAPNo, VisNo, FastTime AS FastTimeRaw, Fast_HM FROM VisitVitals") %>%
mutate(FastTime = ifelse(FastTimeRaw < 888, FastTimeRaw, NA),
```

## Jonaitis: Plasma p-tau217 in preclinical Alzheimer's disease

```
FastImputed = ifelse(is.na(FastTime), 0, FastTime))

cdr <- read.csv("G:/Team/AD_Program_InternalCollab/UP centiles/data/Freeze 2020_May/all_up_centiles_freeze21_20210118_wide.csv")
%>%
  filter(Data.Source=="WRAP") %>%
  select(Reggieid, VisNo=Visit_Number, cdr.xw, cdr.var, cdrsb.xw, cdrsb.var)

np <- odbc::dbGetQuery(freeze,
  "SELECT np.WRAPNo, np.VisNo, tttotal, drraw, wmsrtot, wmsrtot2,
  bvmttot As bvmttot_chr, bvmtdel As bvmtdel_chr,
  iqdspf, iqdspb, iqlnsr,
  trla, trlb, waisrtot, StroopCW_Cor,
  flucfl, animtotraw, bnttot, minttot,
  mmsetot, cdtts, z_pacc3_ds, z_pacc4_ds_mmse, z_pacc4_ds_cfl
  FROM NeuropsychScores np LEFT JOIN CompositeScores cs
  ON np.WRAPNo=cs.WRAPNo AND np.VisNo=cs.VisNo") %>%
  mutate(bvmttot = as.numeric(bvmttot_chr),
  bvmtdel = as.numeric(bvmtdel_chr)) %>%
  group_by(WRAPNo, VisNo) %>%
  pivot_longer(cols=c(tttotal, drraw, wmsrtot, wmsrtot2, bvmttot, bvmtdel,
  iqdspf, iqdspb, iqlnsr,
  trla, trlb, waisrtot, StroopCW_Cor,
  flucfl, animtotraw, bnttot, minttot,
  mmsetot, cdtts, z_pacc3_ds, z_pacc4_ds_mmse, z_pacc4_ds_cfl),
  names_to="measure",
  values_to="value") %>%
  arrange(WRAPNo, VisNo) %>%
  filter(!is.na(value) & value<888) %>%
  pivot_wider(id_cols=c("WRAPNo", "VisNo"),
  names_from="measure",
  values_from="value",
  values_fill=NA)

practice <- select(np, WRAPNo, VisNo, z_pacc3_ds) %>%
  filter(!is.na(z_pacc3_ds)) %>%
  arrange(WRAPNo, VisNo) %>%
  group_by(WRAPNo) %>%
  mutate(practice = (c(1:n()))-1) %>%
  ungroup()

npbase <- odbc::dbGetQuery(freeze,
  "SELECT WRAPNo, VisNo, iq4fulls, readstn
  FROM NeuropsychScores") %>%
  pivot_longer(cols=c(iq4fulls, readstn),
  names_to="measure",
  values_to="value") %>%
  arrange(WRAPNo, VisNo) %>%
  filter(!is.na(value) & value<888) %>%
  group_by(WRAPNo, measure) %>%
  slice(1) %>%
  pivot_wider(id_cols=c("WRAPNo"),
```

## Jonaitis: Plasma p-tau217 in preclinical Alzheimer's disease

```
      names_from="measure",
      names_prefix="base_",
      values_from="value",
      values_fill=NA)

npall      <- merge(npbase, np, all=TRUE) %>%
      merge(practice, all=TRUE)

picklist_wrapdb <- merge(picklist, vv, all.x=TRUE) %>%
      merge(dm, all.x=TRUE) %>%
      merge(cc, all.x=TRUE) %>%
      merge(npall, all.x=TRUE)

# Criterion measurements
# PiB observations

pibfile <- "./data/panda_pib_dvr_20220316.csv"
pib.df <- read.csv(pibfile, skip=1) %>%
  select(Reggieid=reggieid,
         pib_age=age_at_appointment, pib_index) %>%
  arrange(Reggieid, pib_age) %>%
  group_by(Reggieid) %>%
  mutate(pibno = c(1:n())) %>%
  ungroup() %>%
  mutate(pib_bin = factor(ifelse(is.na(pib_index), NA, ifelse(pib_index>1.19, "PiB+", "PiB-")),
                          levels=c("PiB-", "PiB+"),
                          ordered=TRUE),
         pib_bin_lib = factor(ifelse(is.na(pib_index), NA, ifelse(pib_index>1.16, "PiB+", "PiB-")),
                              levels=c("PiB-", "PiB+"),
                              ordered=TRUE),
         pib_tern = factor(ifelse(is.na(pib_index), NA,
                                   ifelse(pib_index>1.19, "PiB+",
                                           ifelse(pib_index>1.15, "PiB?", "PiB-"))),
                            levels=c("PiB-", "PiB?", "PiB+"),
                            ordered=TRUE),
         pib_quatern = factor(ifelse(is.na(pib_index), NA,
                                      ifelse(pib_index>1.19, "PiB+",
                                              ifelse(pib_index>1.15, "PiB?+",
                                                      ifelse(pib_index>1.1, "PiB?-", "PiB-"))),
                               levels=c("PiB-", "PiB?-", "PiB?+", "PiB+"),
                               ordered=TRUE))

pibconv.df <- filter(pib.df, Reggieid %in% picklist_wrapdb$Reggieid) %>%
  group_by(Reggieid) %>%
  arrange(Reggieid, pib_age) %>%
  summarize(min_pib_age = first(pib_age),
            max_pib_age = last(pib_age),
            first_pib_index = first(pib_index),
            first_pib_bin = first(pib_bin),
            first_pib_tern = first(pib_tern),
```



## Jonaitis: Plasma p-tau217 in preclinical Alzheimer's disease

```
first_pib_quatern = first(pib_quatern),
last_pib_index = last(pib_index),
last_pib_bin = last(pib_bin),
last_pib_tern = last(pib_tern),
last_pib_quatern = last(pib_quatern),
max_pib_index = max(pib_index),
max_pib_bin = max(pib_bin),
max_pib_bin_lib = max(pib_bin_lib),
max_pib_tern = max(pib_tern),
max_pib_quatern = max(pib_quatern),
convert_pib = if (min_pib_age==max_pib_age) { NA }
               else { (first_pib_index < 1.19 & last_pib_index > 1.19) },
n_neg_pib = length(pib_bin[pib_index <= 1.1]),
n_pib = n()

# Finding closest PiB measurement
# Don't necessarily want just closest EDTA. Want whole swath of them
picklist_nearest_pib <- merge(pib.df, pibconv.df, by="Reggieid") %>%
  arrange(Reggieid, pib_age) %>%
  merge(picklist_wrapdb, by="Reggieid") %>%
  mutate(delta_pib_lab = abs(pib_age - AgeAtBlood)) %>%
  group_by(Reggieid, pib_age) %>%
  arrange(Reggieid, delta_pib_lab) %>%
  slice(1) %>%
  ungroup() %>%
  select(Reggieid, pib_age, AgeAtBlood, delta_pib_lab, VisNo, pib_index, pib_bin, pib_bin_lib,
         max_pib_bin, max_pib_bin_lib) %>%
  arrange(Reggieid, desc(pib_bin), delta_pib_lab) %>%
  group_by(Reggieid) %>%
  slice(1)

picklist_nearest_pib_lrow_2y <- filter(picklist_nearest_pib, delta_pib_lab<2)
write.csv(picklist_nearest_pib_lrow_2y, file="./data/ptau217_merged_covariates_for_roc.csv", row.names=FALSE)

gbtm_file <- "G:/Team/AD_Program_InternalCollab/AmyloidModeling_ADNI-WRAP/data/est_dvr_at_edta_gbtm_pcws_updttd.xlsx"
# Centiloid formula per email from SCJ 2022-03-24 2:06 pm
gbtm_est <- read_excel(path=gbtm_file) %>%
  select(Reggieid=reggieid, AgeAtBlood, gbtm_pred = pred_pibdvr_at_edta, gbtm_chron = edta_chron) %>%
  mutate(gbtm_chron_trunc = ifelse(gbtm_chron<=-10, -10, gbtm_chron),
         gbtm_centiloid = gbtm_pred*148.33-154.96)

illa_file <- "./data/illa-estimates_at_edta_ages.csv"
illa_est <- read.csv(file=illa_file) %>%
  select(Reggieid=reggieid, AgeAtBlood=age, illa_pred=estval)

picklist_est_pib <- merge(picklist_wrapdb,
  pibconv.df, all.x=TRUE) %>%
  merge(gbtm_est, all.x=TRUE) %>%
  merge(illa_est, all.x=TRUE)
```

## Jonaitis: Plasma p-tau217 in preclinical Alzheimer's disease

```
# MK
factor_yn <- function(x) { return(factor(x, levels=c("N","Y"), ordered=TRUE)) }
mkfile <- "./data/panda_mk_braak_20220316.csv"
mk.df <- read.csv(mkfile, skip=1) %>%
  select(Reggieid=reggieid,
         mk_age=Pet.age_at_appointment, braak_1:braak_6) %>%
  mutate(across(.cols=braak_1:braak_6, .fns=factor_yn)) %>%
  mutate(mtl_bin = pmax(braak_1, braak_2, na.rm=TRUE),
         neo_bin = pmax(braak_3, braak_4, braak_5, braak_6, na.rm=TRUE),
         mk_cat = factor(ifelse(is.na(mtl_bin), NA,
                                ifelse(mtl_bin=='N',
                                       ifelse(neo_bin=='N', 'MK-', 'Neo only'),
                                       ifelse(neo_bin=='N', 'MTL only', 'MTL+Neo'))),
                          levels=c('MK-', 'Neo only', 'MTL only', 'MTL+Neo'),
                          ordered=TRUE))
mkconv.df <- filter(mk.df, Reggieid %in% picklist_wrapdb$Reggieid) %>%
  group_by(Reggieid) %>%
  arrange(Reggieid, mk_age) %>%
  summarize(min_mk_age = first(mk_age),
           max_mk_age = last(mk_age),
           first_mk_cat = first(mk_cat),
           last_mk_cat = last(mk_cat),
           min_mk_cat = min(mk_cat, na.rm=TRUE),
           max_mk_cat = max(mk_cat, na.rm=TRUE),
           convert_mk = if (min_mk_age==max_mk_age) { NA }
             else { (min_mk_cat < max_mk_cat) })

picklist_nearest_mk <- merge(mk.df, mkconv.df, by="Reggieid") %>%
  arrange(Reggieid, mk_age) %>%
  merge(picklist_wrapdb, by="Reggieid") %>%
  mutate(delta_mk_lab = abs(mk_age - AgeAtBlood)) %>%
  group_by(Reggieid, mk_age) %>%
  arrange(Reggieid, delta_mk_lab) %>%
  slice(1) %>%
  ungroup() %>%
  select(Reggieid, mk_age, AgeAtBlood, delta_mk_lab, VisNo, mk_cat) %>%
  mutate(mk_bin = factor(ifelse(is.na(mk_cat), NA, ifelse(mk_cat=="MTL+Neo", 1, 0)),
                        levels=c(0,1),
                        labels=c("None or MTL/Neo only", "MTL + Neocortex"))) %>%
  arrange(Reggieid, desc(mk_bin), delta_mk_lab) %>%
  group_by(Reggieid) %>%
  slice(1)

picklist_nearest_mk_lrow_2y <- filter(picklist_nearest_mk, delta_mk_lab<2)
write.csv(picklist_nearest_mk_lrow_2y, file="./data/ptau217_merged_covariates_for_roc_mk.csv", row.names=FALSE)

picklist_est_pib_mk <- merge(picklist_est_pib, mkconv.df, all.x=TRUE)
```

## Jonaitis: Plasma p-tau217 in preclinical Alzheimer's disease

```
# Pulling in LP information
lpfile <- "G:/Team/Van Hulle 4-3-2019/NTK/raw data/shared_csf_panda_batch5678_20200226.csv"
lp.df <- read.csv(lpfile, stringsAsFactors=FALSE, skip=1) %>%
  rename(Reggieid = reggieid,
         WRAPNo = wrapnum,
         ABeta_1_40_result_ng = ABeta_1_40_result,
         lp_age = age_at_appointment) %>%
  filter(Reggieid %in% picklist_wrapdb$Reggieid) %>%
  mutate(ABeta_1_40_result = nano_to_pico(ABeta_1_40_result_ng)) %>%
  arrange(Reggieid, lumbarpuncture_date_date, lp_age) %>%
  select(Reggieid, everything()) %>%
  group_by(Reggieid) %>%
  arrange(Reggieid, lp_age) %>%
  mutate(LP_Number = c(1:n()),
         lp_age = ifelse(Reggieid==8846 & lp_age==56.54, 56.52,
                        ifelse(Reggieid==5860 & lp_age==64.88, 64.91, lp_age))) %>%
  ungroup() %>%
  group_by(Reggieid, LP_Number, lp_age) %>%
  select(Reggieid, LP_Number, lp_age, ABeta_1_42_result, ABeta_1_40_result, pTau_result, NFL_result) %>%
  gather(key="assay", value="result_char", ABeta_1_42_result:NFL_result) %>%
  ungroup() %>%
  mutate(assay=gsub("_result","", assay, fixed=TRUE),
         result=ifelse(grepl("<", result_char, fixed=TRUE), LLMR[assay],
                       ifelse(grepl(">", result_char, fixed=TRUE), ULMR[assay],
                               as.numeric(result_char)))) %>%
  select(-result_char) %>%
  filter(!is.na(result)) %>% # Remove NA rows - Reggieid 1681 dup
  group_by(Reggieid, assay, lp_age) %>%
  arrange(Reggieid, assay, lp_age, result) %>%
  spread(key="assay", value="result", fill=NA) %>%
  ungroup() %>%
  group_by(Reggieid, LP_Number) %>%
  mutate(ABeta_1_42_40_derived = ifelse(is.na(ABeta_1_42) | is.na(ABeta_1_40), NA, golden_round(ABeta_1_42/ABeta_1_40)),
         pTau_ABeta_1_42_derived = ifelse(is.na(pTau) | is.na(ABeta_1_42), NA, golden_round(pTau/ABeta_1_42)),
         ABeta_1_42_40_derived_bin = ABeta_1_42_40_derived<cutoff["ABeta_1_42_40_derived"],
         pTau_ABeta_1_42_derived_bin = pTau_ABeta_1_42_derived>cutoff["pTau_ABeta_1_42_derived"],
         ABeta_1_42_bin = ABeta_1_42<cutoff["ABeta_1_42"],
         pTau_bin = pTau>cutoff["pTau"]) %>%
  ungroup()
lpconv.df <- group_by(lp.df, Reggieid) %>%
  filter(!is.na(ABeta_1_42_40_derived) & !is.na(pTau_ABeta_1_42_derived)) %>%
  arrange(Reggieid, lp_age) %>%
  summarize(first_lp_age = first(lp_age),
            last_lp_age = last(lp_age),
            first_ABeta_1_42_40_derived_bin = first(ABeta_1_42_40_derived_bin),
            last_ABeta_1_42_40_derived_bin = last(ABeta_1_42_40_derived_bin),
            max_ABeta_1_42_40_derived_bin = max(ABeta_1_42_40_derived_bin),
            first_pTau_ABeta_1_42_derived_bin = first(pTau_ABeta_1_42_derived_bin),
```

## Jonaitis: Plasma p-tau217 in preclinical Alzheimer's disease

```
last_pTau_ABeta_1_42_derived_bin = last(pTau_ABeta_1_42_derived_bin),
max_pTau_ABeta_1_42_derived_bin = max(pTau_ABeta_1_42_derived_bin),
convert_ABeta_1_42_40_derived = if (first_lp_age==last_lp_age) { NA }
                                else {(first_ABeta_1_42_40_derived_bin==0 &
                                        last_ABeta_1_42_40_derived_bin==1)},
convert_pTau_ABeta_1_42_derived = if (first_lp_age==last_lp_age) { NA }
                                else {(first_pTau_ABeta_1_42_derived_bin==0 &
                                        last_pTau_ABeta_1_42_derived_bin==1)}})
```

```
picklist_est_pib_mk_lp <- merge(picklist_est_pib_mk, lpconv.df, all.x=TRUE)
```

```
write.csv(picklist_est_pib_mk_lp, file="./data/ptau217_merged_covariates_for_analyses_v2.csv", row.names=FALSE)
```

```
# Checking changes
```

```
old_covs <- read.csv("./data/ptau217_merged_covariates_for_analyses.csv")
```

```
new_covs <- picklist_est_pib_mk_lp
```

```
check_covs <- merge(select(old_covs, Reggieid, VisNo, old_age=AgeAtBlood, old_max_pib=max_pib_bin, old_max_mk=max_mk_bin),
                    select(new_covs, Reggieid, VisNo, new_age=AgeAtBlood, new_max_pib=max_pib_bin, new_max_mk=max_mk_cat),
                    all=TRUE)
```

```
# Changed max_pib_bin: just 3
```

```
group_by(check_covs, old_max_pib, new_max_pib) %>% summarize(N=n())
```

```
# Altered max_mk_bin: All, since we modified our strategy.
```

```
group_by(check_covs, old_max_mk, new_max_mk) %>% summarize(N=n()) %>% arrange(desc(N))
```

```
# Nobody appears newly here (that makes sense; I think subjects needed to have scans to be included
```
